# Supplementary material for: Lipid Emulsion Improves Functional Recovery in an Animal Model of Stroke
Source: PubMed Central journal article supplement (PMC7582956; doi:10.3390/ijms21197373), 2020-10-06
Supplement: ijms-21-07373-s001.pdf [file ijms-21-07373-s001.pdf]

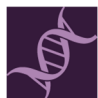

1 *Supplementary Materials*

2 **Lipid emulsion improves functional recovery in an**  
3 **animal model of stroke**

4 **Motomasa Tanioka** <sup>1,2</sup>, **Wyun Kon Park** <sup>3</sup>, **Joohyun Park** <sup>2,4</sup>, **Jong Eun Lee** <sup>2,4</sup>, and **Bae Hwan Lee** <sup>1,2,\*</sup>

5 <sup>1</sup> Department of Physiology, Yonsei University College of Medicine, Seoul 03722, Republic of Korea;  
6 hpark@yuhs.ac (M.T.)

7 <sup>2</sup> Brain Korea 21 PLUS Project for Medical Science, Yonsei University College of Medicine, Seoul 03722,  
8 Republic of Korea

9 <sup>3</sup> Department of Anesthesiology and Pain Medicine, Anesthesia and Pain Research Institute,  
10 Yonsei University College of Medicine, Seoul 03722, Republic of Korea; wkp7ark@yuhs.ac (W.K.P.)

11 <sup>4</sup> Department of Anatomy, Yonsei University College of Medicine, Seoul 03722, Republic of Korea;  
12 jhpark922@yuhs.ac (J.P.); jelee@yuhs.ac (J.E.L.)

13 \* Correspondence: bhlee@yuhs.ac; Tel.: +82-2-2228-1711

14

15

16

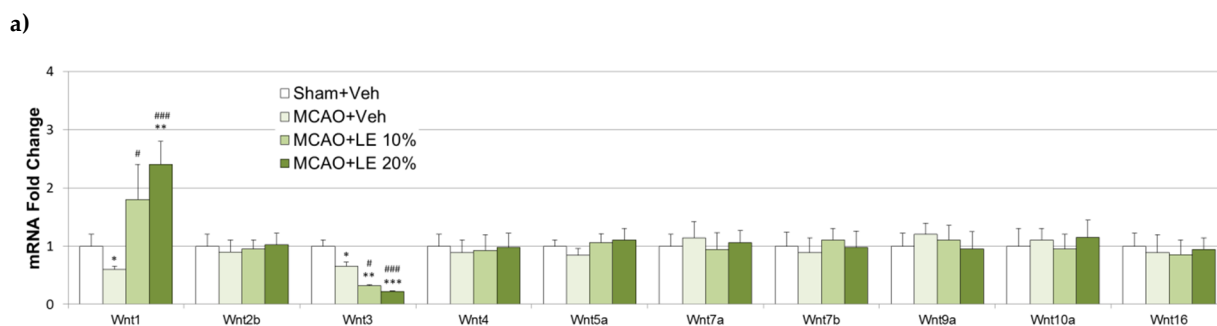

17

18

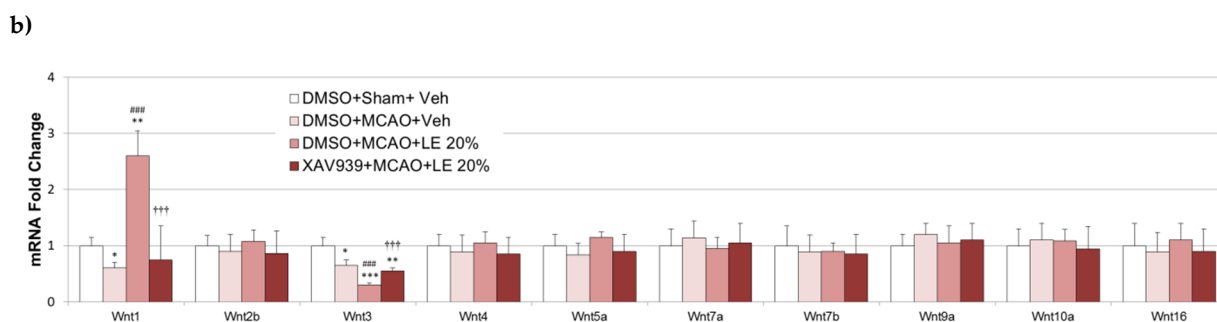

19

20

21

22

23

24

25

26

27

28

29

30

31

32

33

34

35

36

37

38

39

40

41

42

43

**Supplementary Material S1. mRNA expression level of *Wnt* subfamilies.** (a) LE dosage-dependent mRNA expression level of *Wnt* subfamilies. The *Wnt1* mRNA expression of the MCAO+Veh group was significantly decreased compared to the Sham+Veh group. Significantly increased expression of *Wnt1* was expressed in the MCAO+LE 10% and MCAO+LE 20% groups compared to the MCAO+Veh group. *Wnt3* expressions were significantly lower in MCAO injury groups compared to the Sham+Veh group. Significantly decreased *Wnt3* expressions were observed in the MCAO+LE 10% and MCAO+LE 20% groups compared to the MCAO+Veh group. There was no significant difference in other *Wnt* subfamilies. Data are presented as mean  $\pm$  standard error of mean (SEM); n=8 for each group; \*P<0.05, \*\*P<0.01, \*\*\*P<0.001 vs Sham+Veh, #P<0.05, ###P<0.001 vs. MCAO+Veh, one-way analysis of variance (ANOVA) followed by Tukey's multiple comparison test. (b) mRNA expression level of DMSO or XAV939 treated experimental groups. The *Wnt1* mRNA expression of the DMSO+MCAO+Veh group was significantly decreased compared to the DMSO+Sham+Veh group. Significantly increased expression of *Wnt1* was expressed in the DMSO+MCAO+LE 20% group compared to the DMSO+MCAO+Veh group. There was no significant difference in *Wnt1* expression in the XAV939+MCAO+LE 20% group compared to the DMSO+MCAO+Veh group. *Wnt1* decreased significantly in the XAV939+MCAO+LE 20% group compared to the DMSO+MCAO+LE 20% group. *Wnt3* expressions were significantly lower in MCAO-injury groups compared to the DMSO+Sham+Veh group. Significantly decreased *Wnt3* expressions were observed in the DMSO+MCAO+LE 20% group compared to the DMSO+MCAO+Veh and XAV939+MCAO+LE 20% groups. There was no significant difference in other *Wnt* subfamilies. Data are presented as mean  $\pm$  standard error of mean (SEM); n=8 for each group; \*P<0.05, \*\*P<0.01, \*\*\*P<0.001 vs DMSO+Sham+Veh, ###P<0.001 vs. DMSO+MCAO+Veh, †††P<0.001 vs. DMSO+MCAO+LE 20%, one-way analysis of variance (ANOVA) followed by Tukey's multiple comparison test.

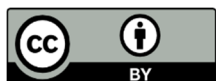

44
